# Supplementary material for: Cerebrospinal fluid metabolomic profiles can discriminate patients with leptomeningeal carcinomatosis from patients at high risk for leptomeningeal metastasis
Source: PubMed Central journal article supplement (PMC5731867; doi:10.18632/oncotarget.20983), 2017-09-18
Supplement: oncotarget-08-101203-s001.pdf [file oncotarget-08-101203-s001.pdf]

# Cerebrospinal fluid metabolomic profiles can discriminate patients with leptomeningeal carcinomatosis from patients at high risk for leptomeningeal metastasis

## SUPPLEMENTARY MATERIALS

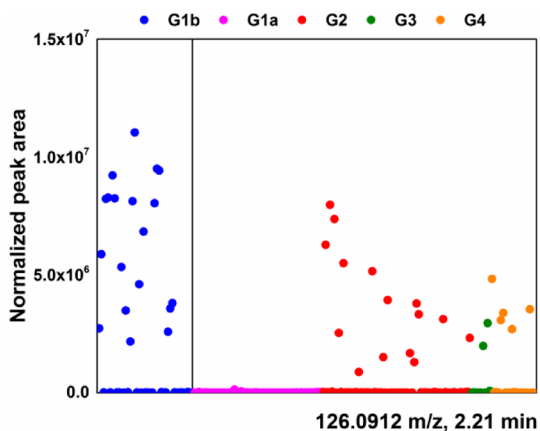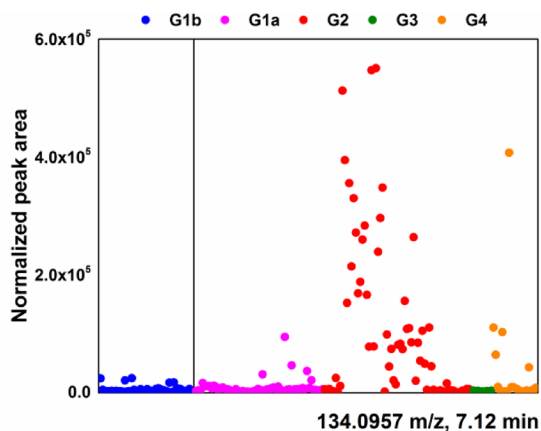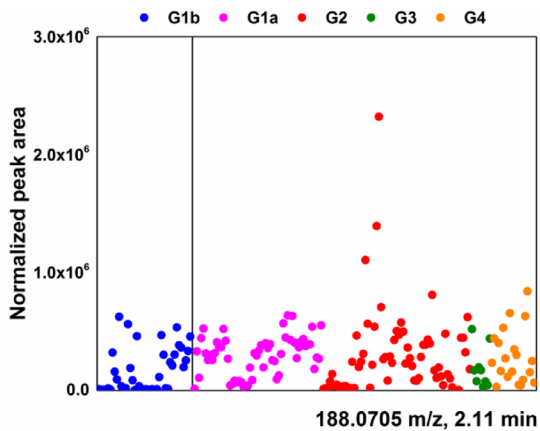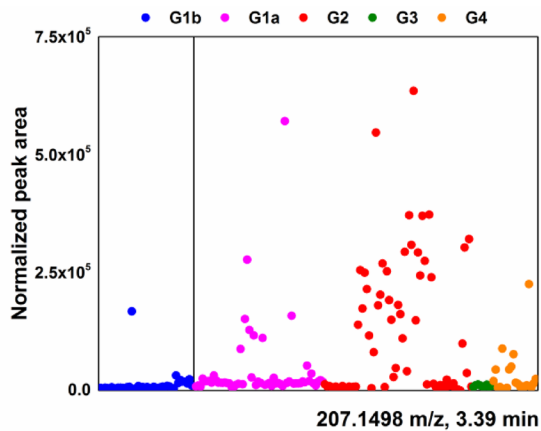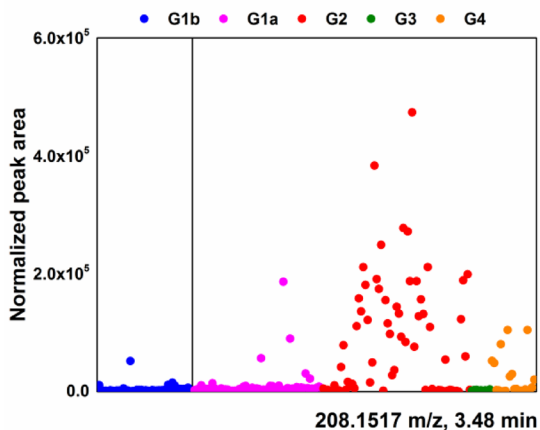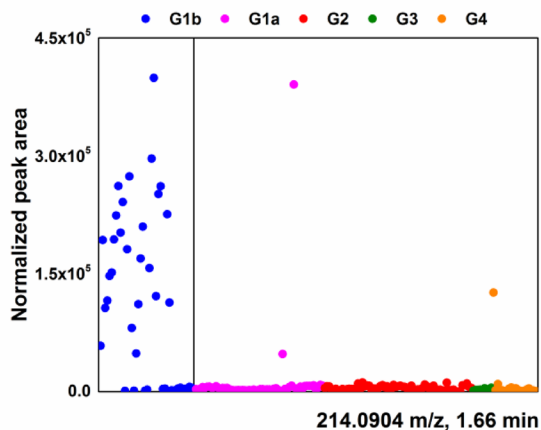

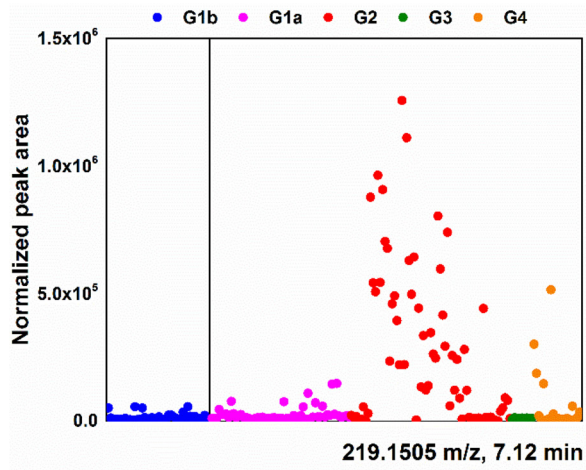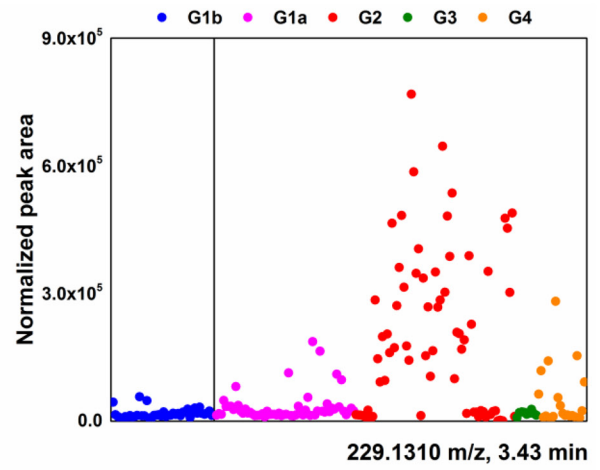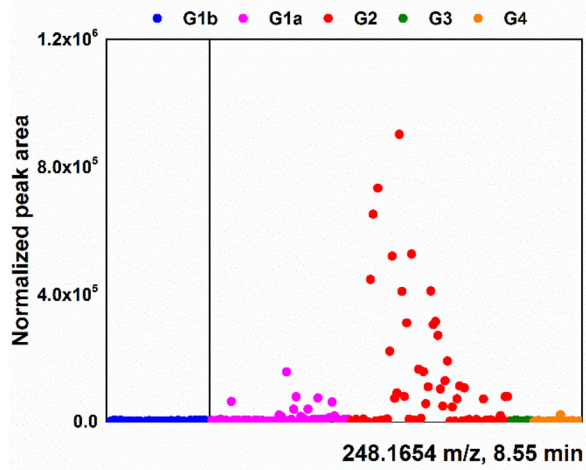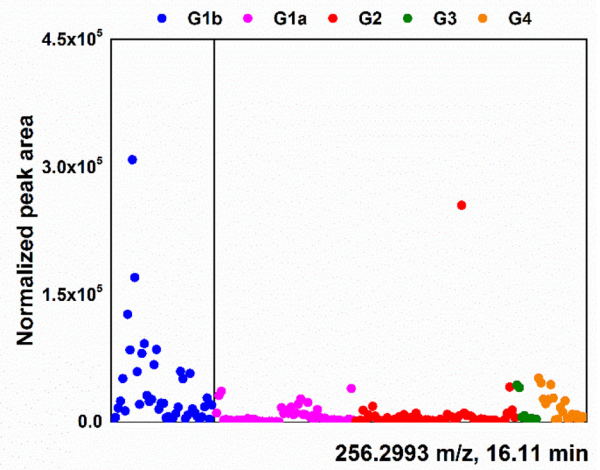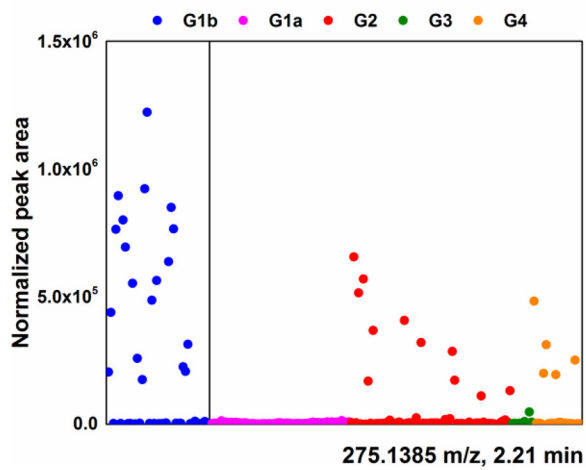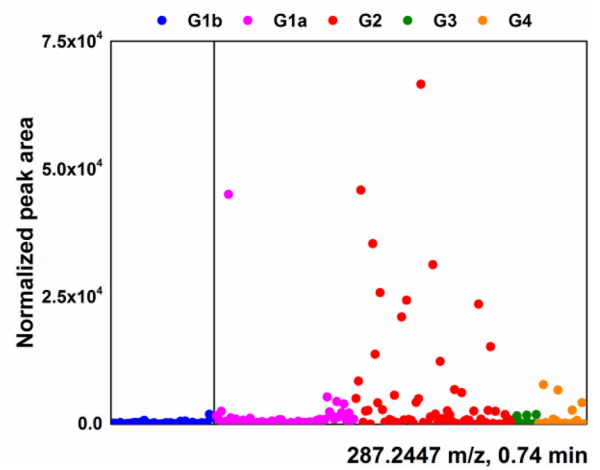

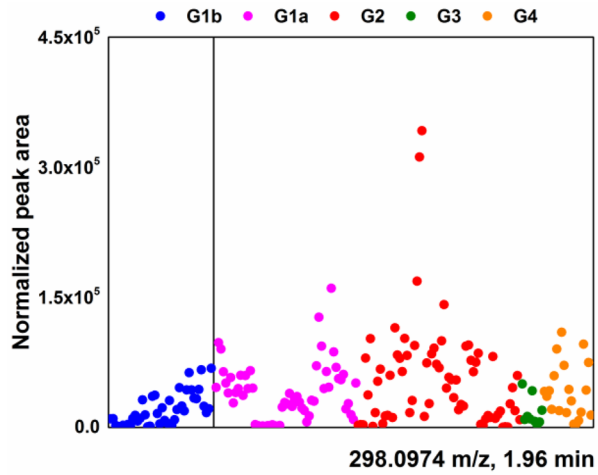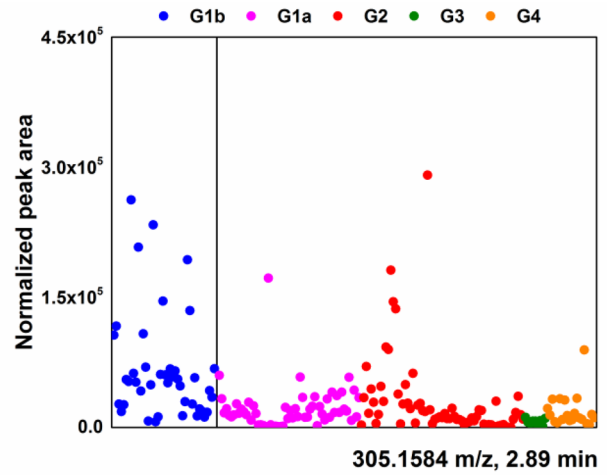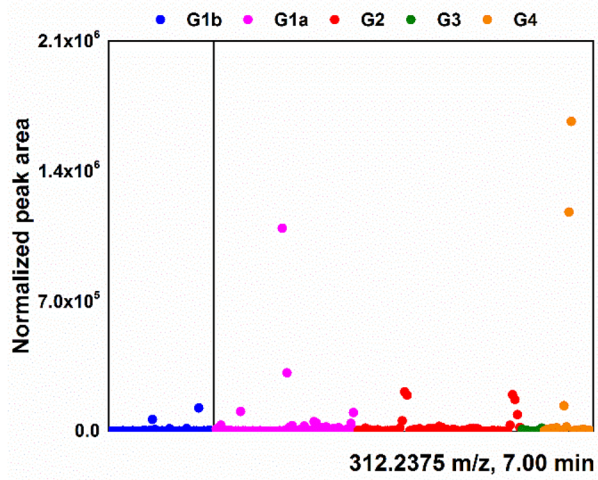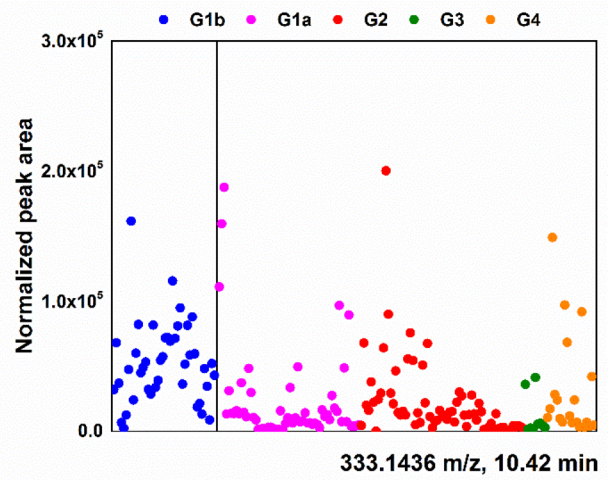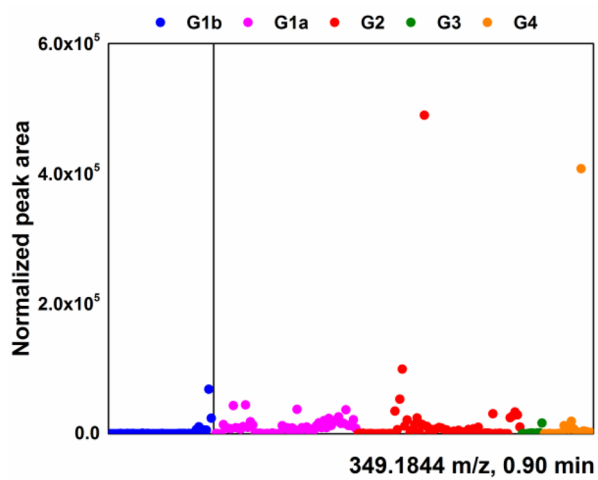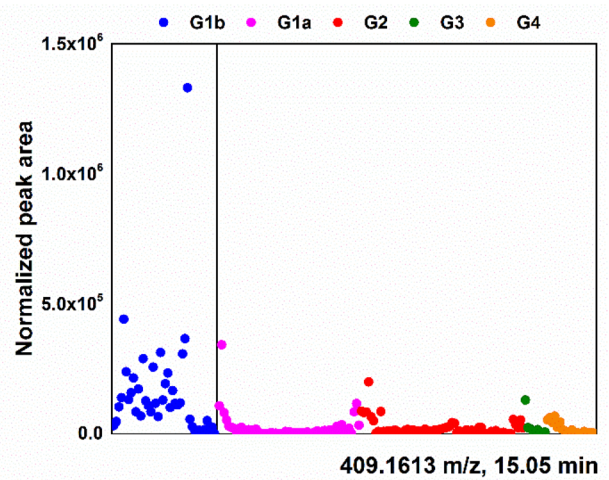



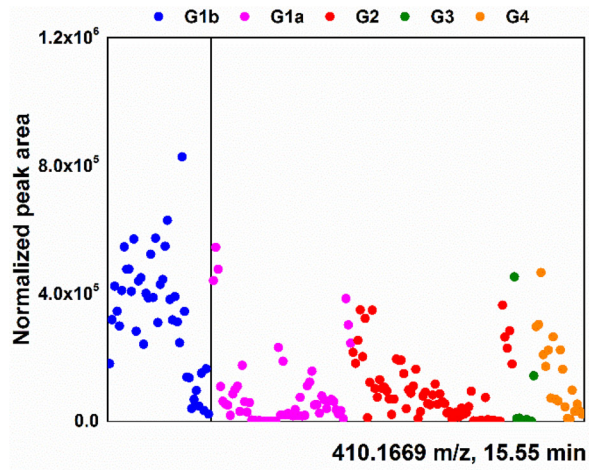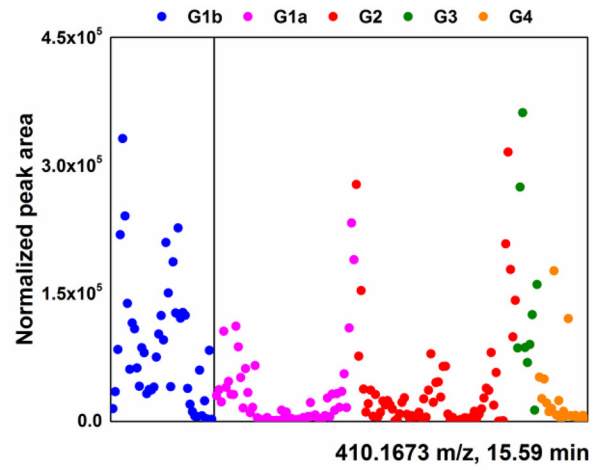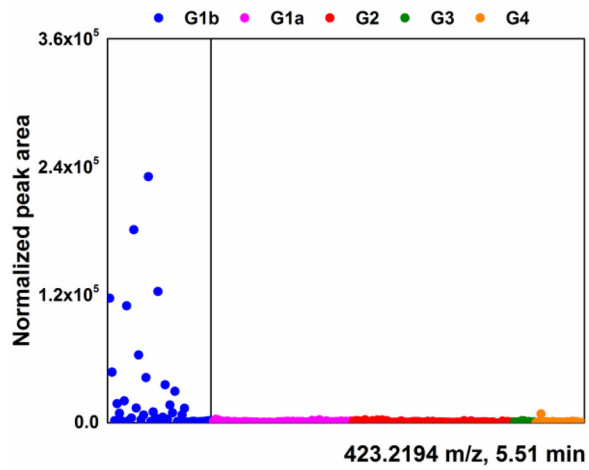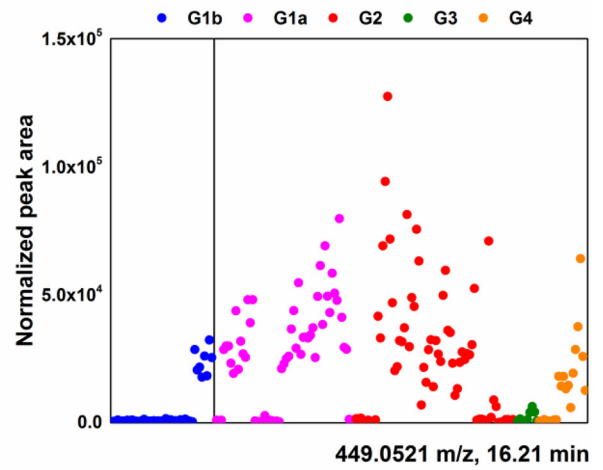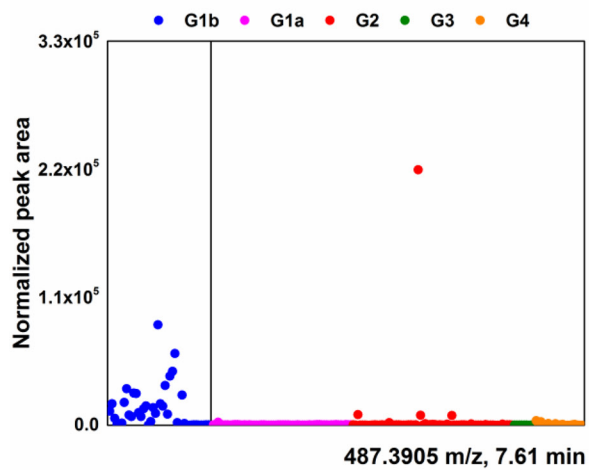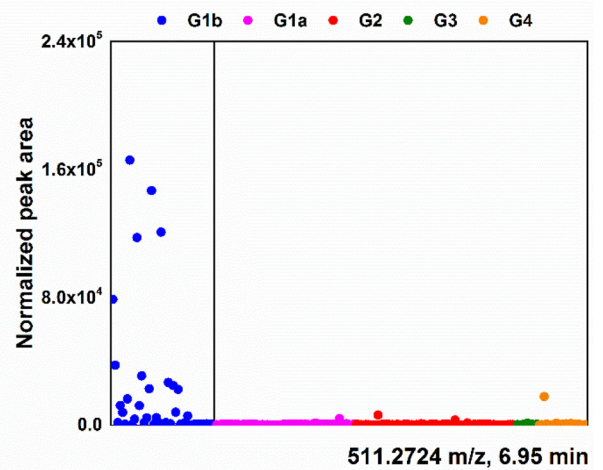



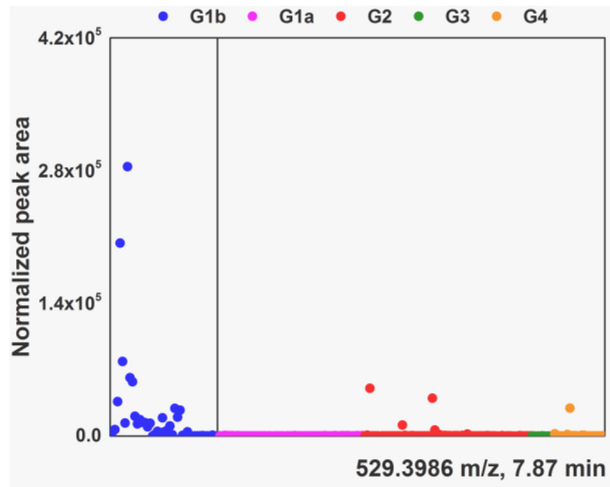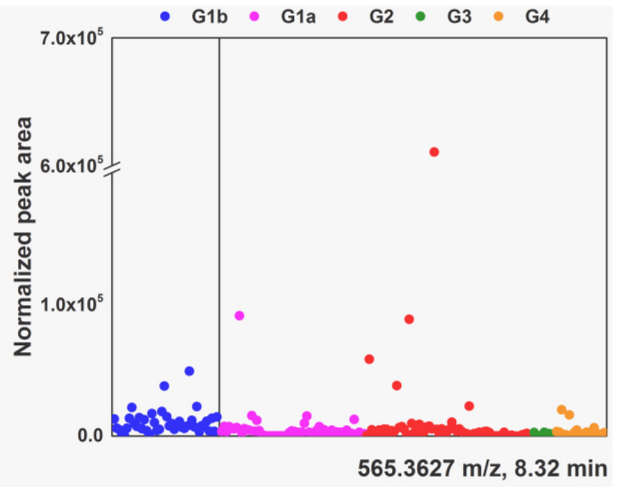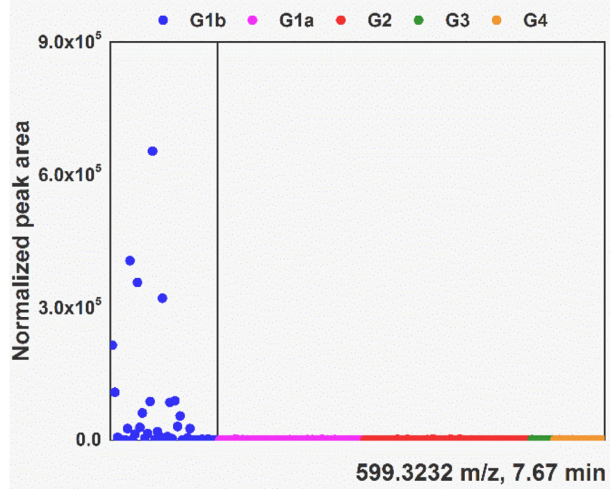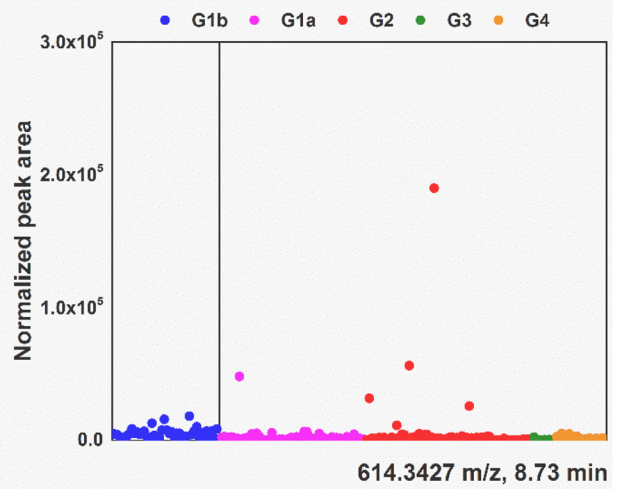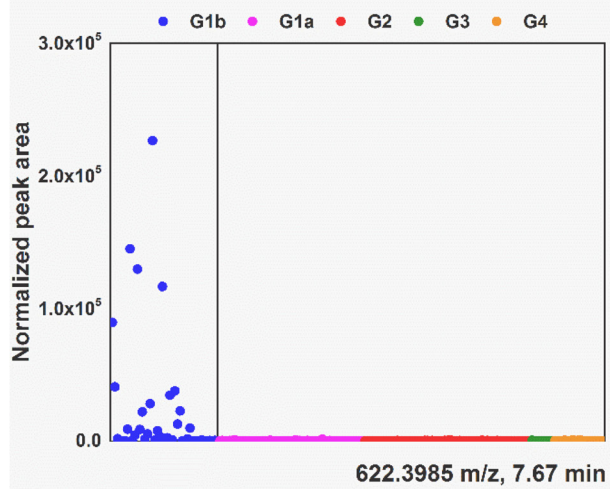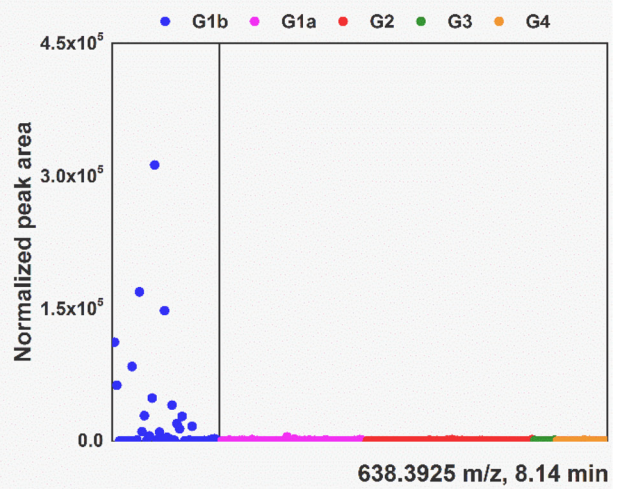

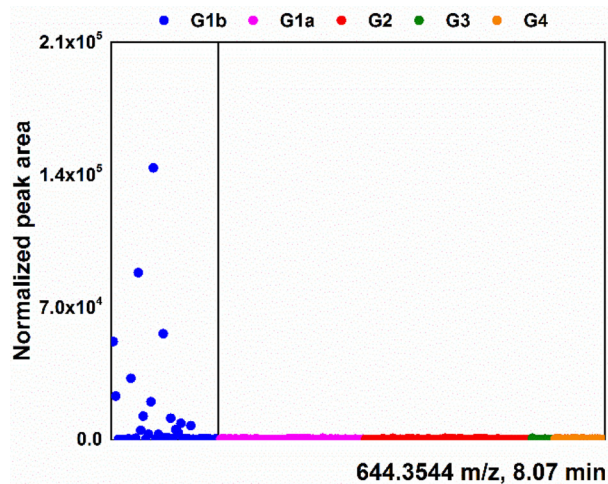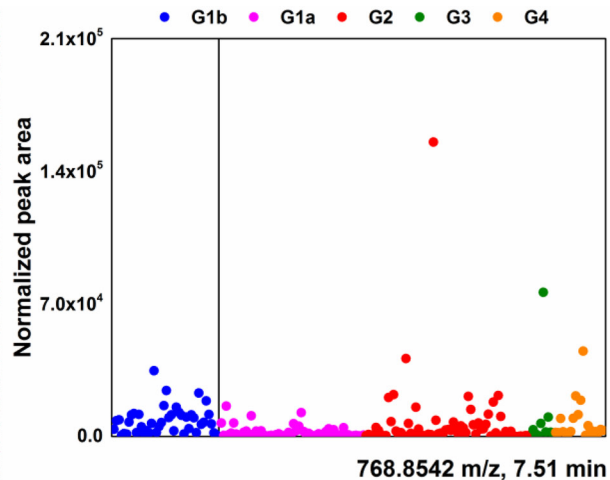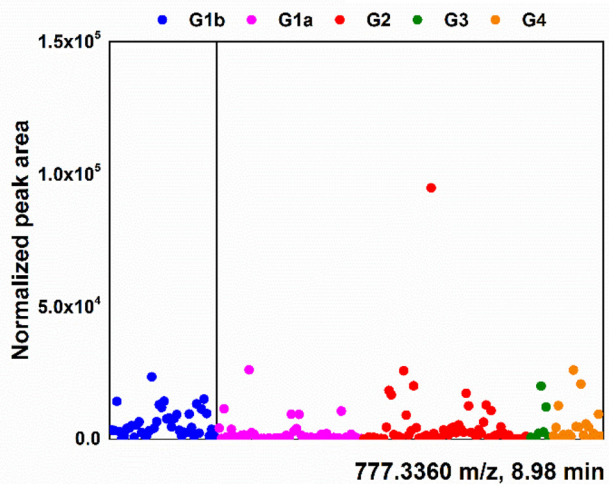

**Supplementary Figure 1: Relative amounts of thirty-three low-mass ions discriminating cancer patients from patients without cancer.** Normalized peak area (arbitrary unit) represents relative amounts of metabolites with a given  $m/z$ , in the CSF.

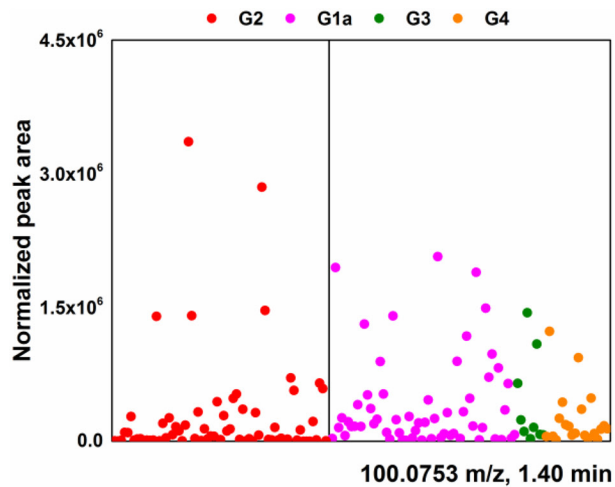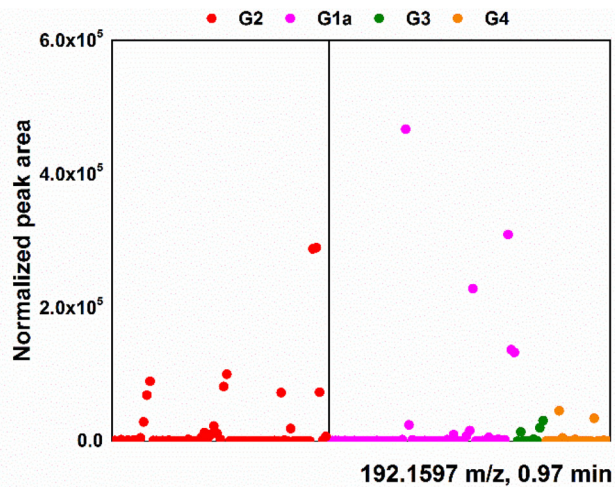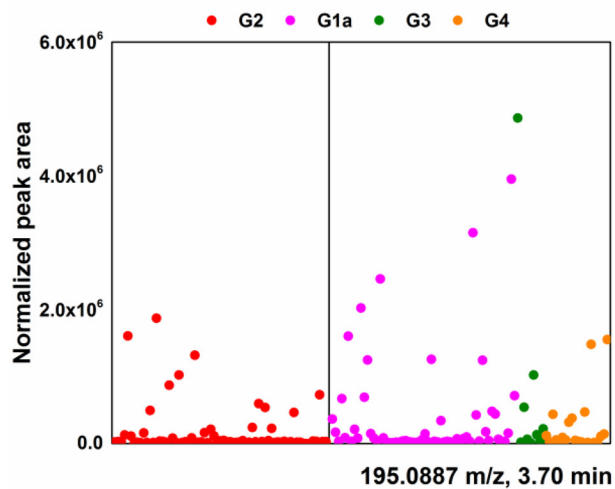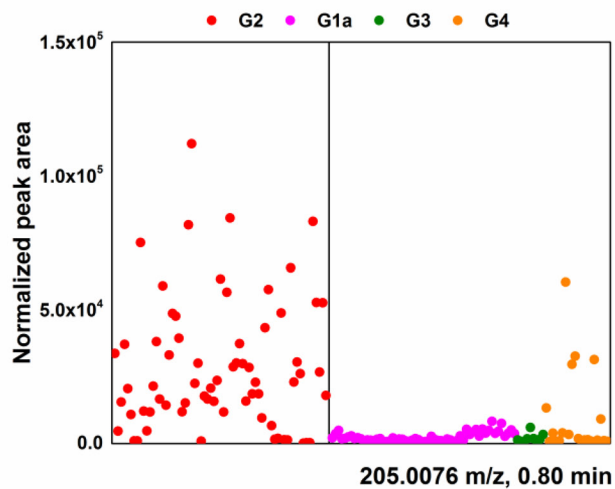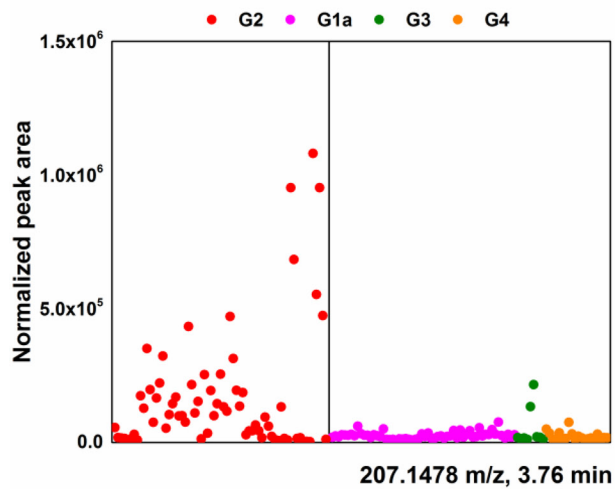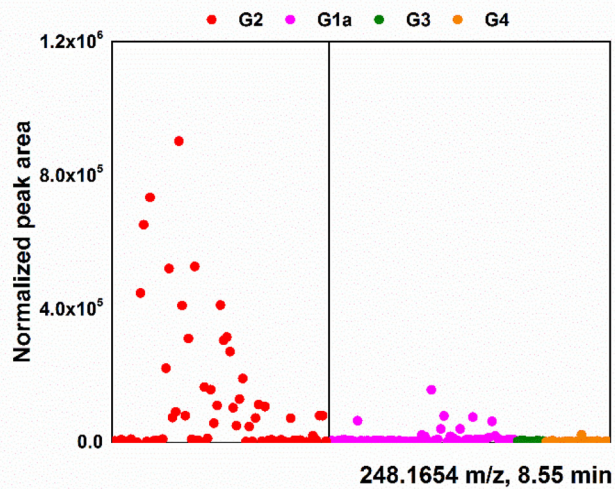



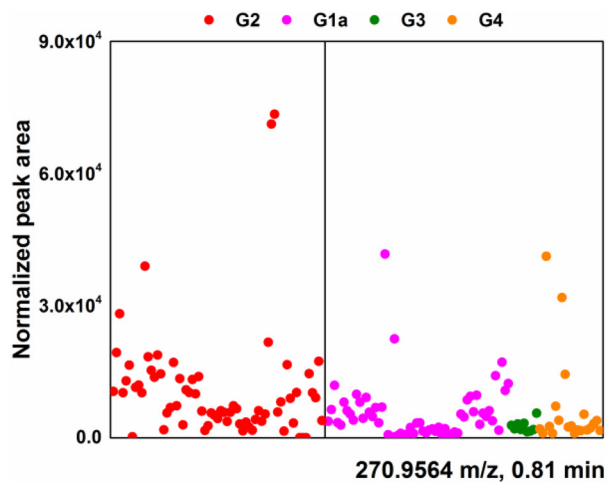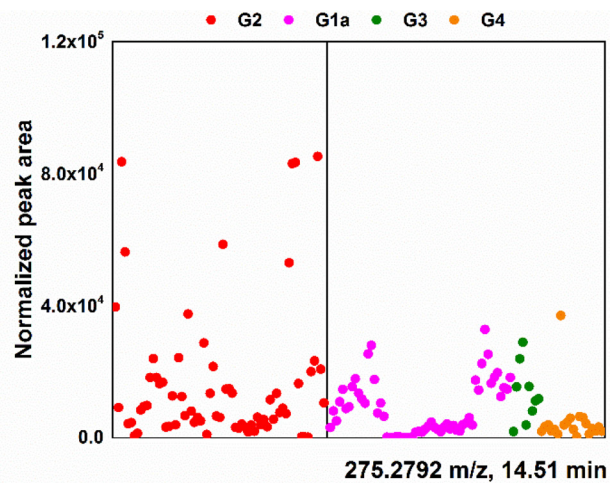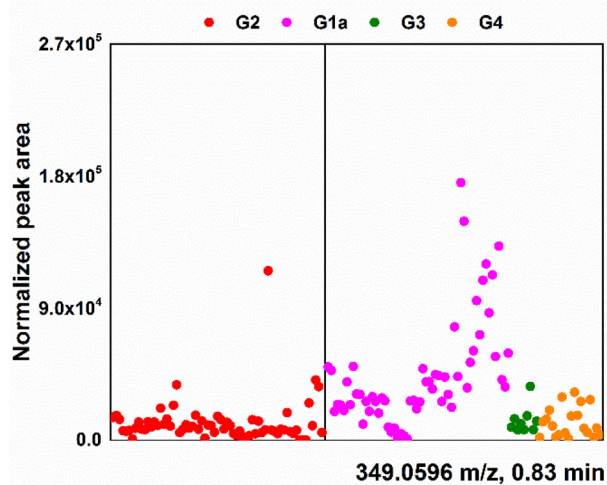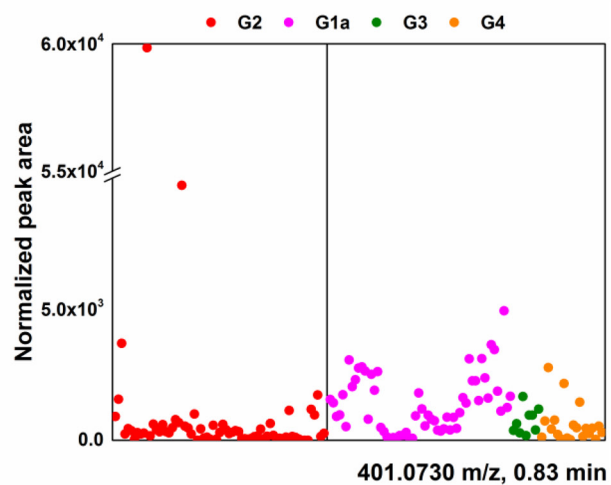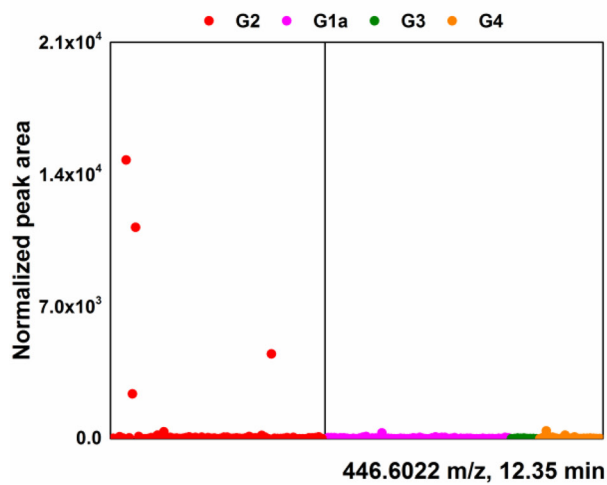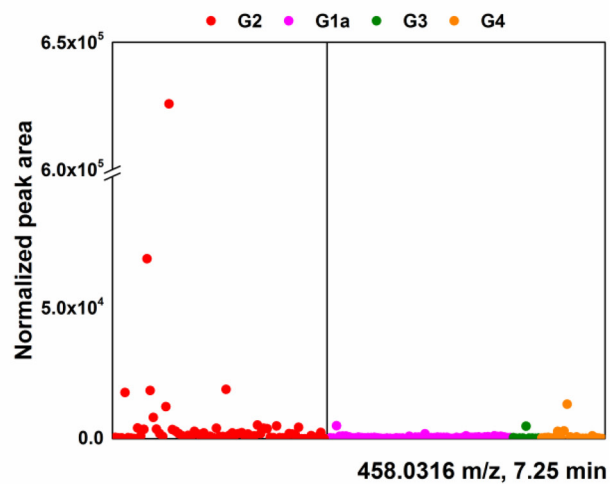

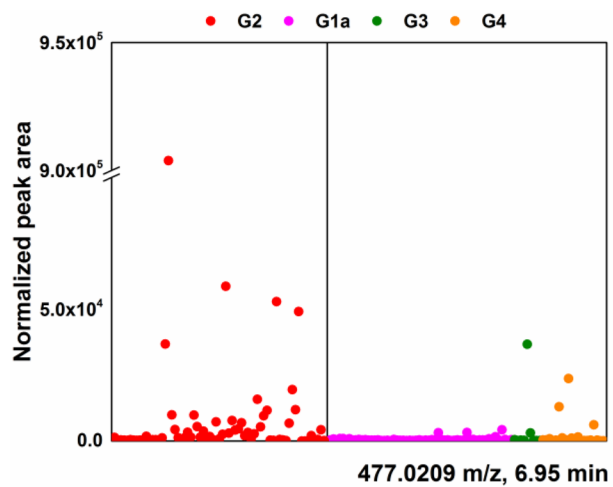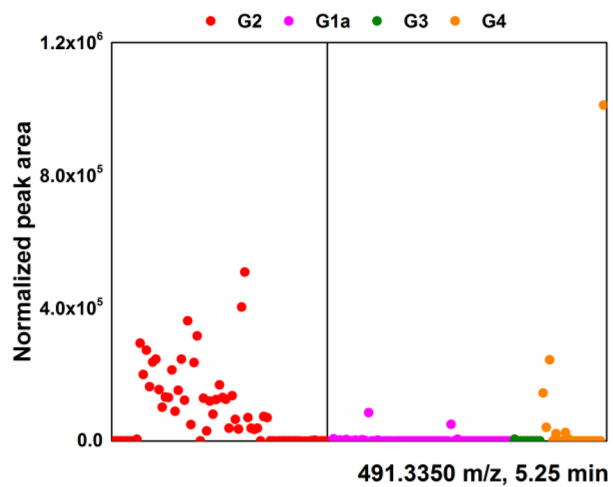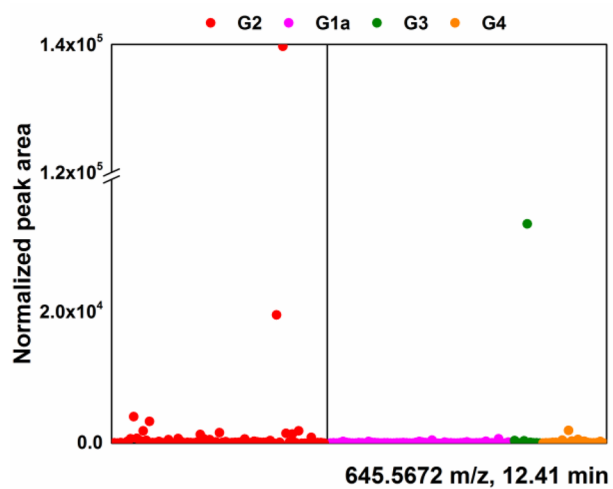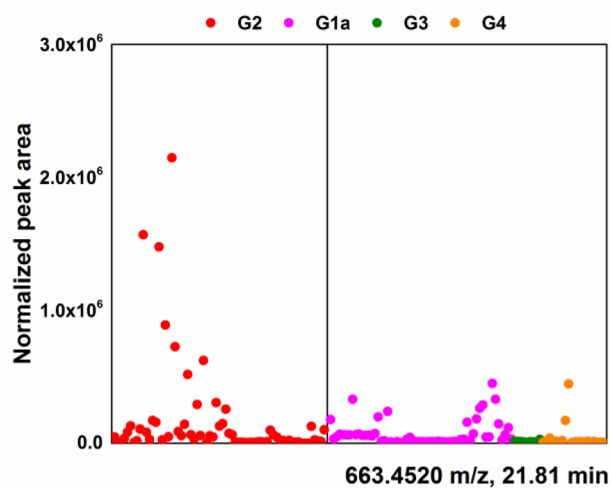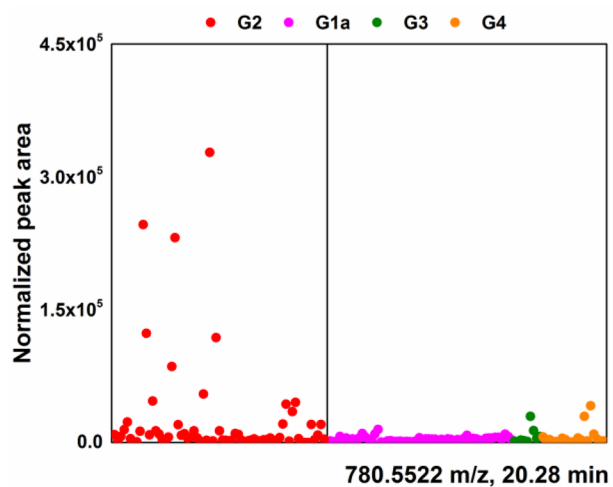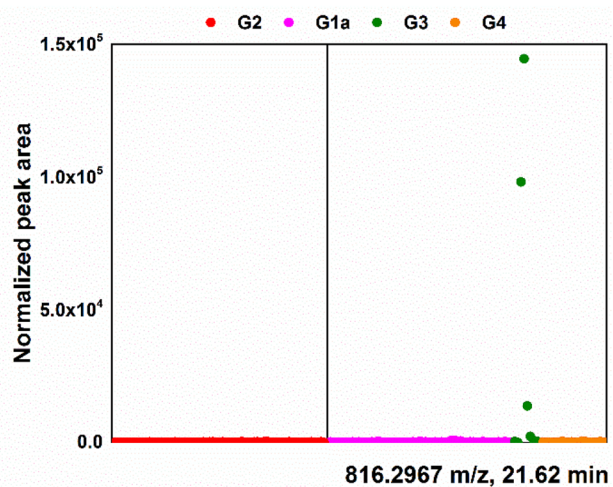

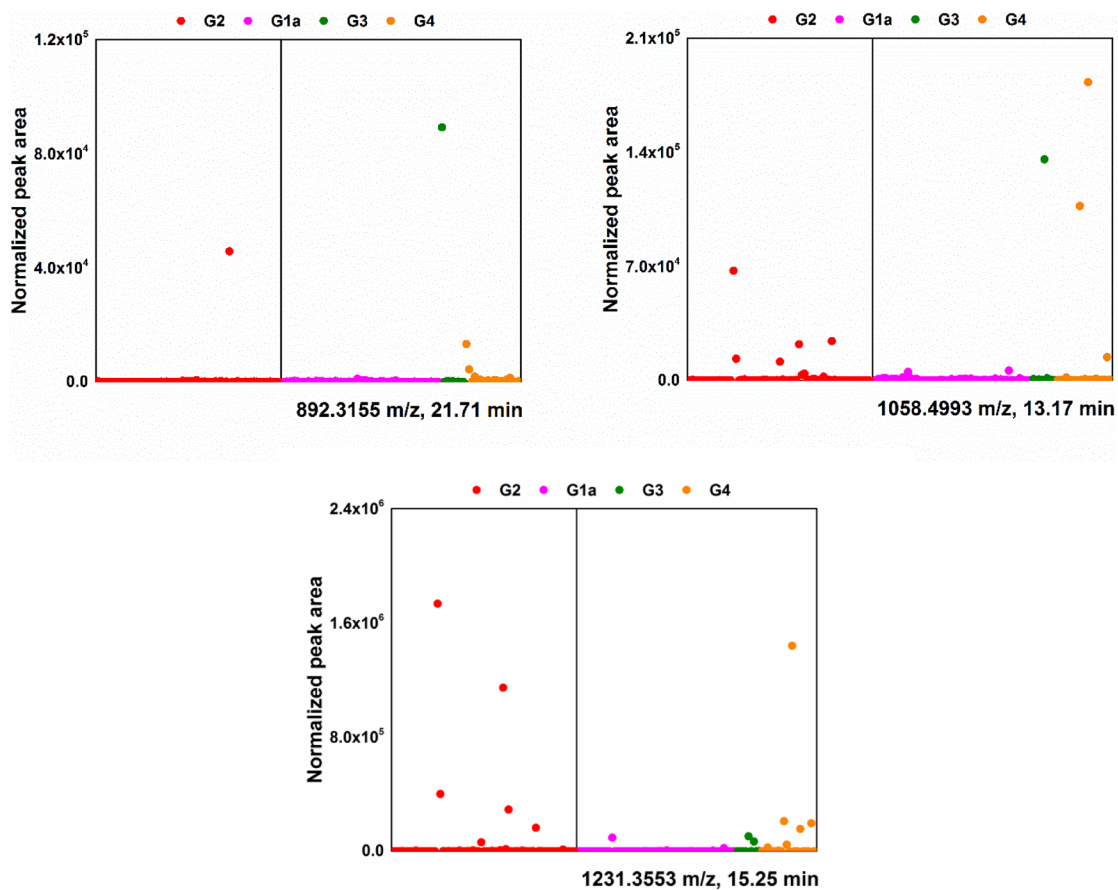

**Supplementary Figure 2: Relative amounts of twenty-one low-mass ions discriminating patients with leptomenigeal metastasis from other groups of patients.** Normalized peak area (arbitrary unit) represents relative amounts of metabolites with a given *m/z*, in the CSF.

**Supplementary Table 1: Thirty-three low-mass ions discriminating cancer patients (groups of 1a, 2, 3 and 4) from patients without cancer (Group 1b).** See\_Supplementary\_Table 1
